# Supplementary material for: Using Machine Learning Methods and Structural Alerts for Prediction of Mitochondrial Toxicity
Source: PubMed Central journal article supplement (PMC7317375; doi:10.1002/minf.202000005), 2020-03-23
Supplement: MINF-39-2000005-s001.pdf [file MINF-39-2000005-s001.pdf]

# molecular informatics

Supporting Information

## **Using Machine Learning Methods and Structural Alerts for Prediction of Mitochondrial Toxicity**

Jennifer Hemmerich<sup>+</sup>, Florentina Troger<sup>+</sup>, Barbara Füzi, and Gerhard F.Ecker\*<sup>©</sup> 2020 The Authors. Published by Wiley-VCH Verlag GmbH & Co. KGaA. This is an open access article under the terms of the Creative Commons Attribution License, which permits use, distribution and reproduction in any medium, provided the original work is properly cited. The copyright line for this article was changed on May 13, 2020 after original online publication.

The supplemental tables B and C as well as the model information and the used datasets are also available as \*.xls / \*.sdf files in our github repository at:

<https://github.com/PharminfoVienna/Mitochondrial-Toxicity>

## SUPPLEMENT A

**Table A** List of RDKit descriptors used for the dataset analysis

|                          |                                                                                           |
|--------------------------|-------------------------------------------------------------------------------------------|
| SlogP                    | Smarts LogP, Octanol Water Partition Coefficient                                          |
| LabuteASA                | Labute's Approximate Surface Area, approximated surface area of a molecule (Labute, 2000) |
| TPSA                     | Total Polar surface area                                                                  |
| ExactMW                  | Molecular weight                                                                          |
| NumRotatableBonds        | Number of rotatable bonds                                                                 |
| NumHBD                   | Number of hydrogen bond donors                                                            |
| NumHBA                   | Number of hydrogen bond acceptors                                                         |
| NumAmideBonds            | Number of amide bonds                                                                     |
| NumHeteroAtoms           | Number of hetero atoms                                                                    |
| NumHeavyAtoms            | Number of heavy atoms                                                                     |
| NumAtoms                 | Number of atoms                                                                           |
| NumRings                 | Number of rings                                                                           |
| NumAromaticRings         | Number of aromatic rings                                                                  |
| NumSaturatedRings        | Number of saturated rings                                                                 |
| NumAliphaticRings        | Number of aliphatic rings                                                                 |
| NumAromaticHeterocycles  | Number of aromatic heterocycles                                                           |
| NumSaturatedHeterocycles | Number of saturated heterocycles                                                          |
| NumAliphaticHeterocycles | Number of aliphatic heterocycles                                                          |
| NumAromaticCarbocycles   | Number of aromatic carbocycles                                                            |

NumSaturatedCarbocycles      Number of saturated carbocycles

NumAliphaticCarbocycles      Number of aliphatic carbocycles

FractionCSP3      Fraction of sp3 hybridized Carbons

SMR      Molecular refractivity

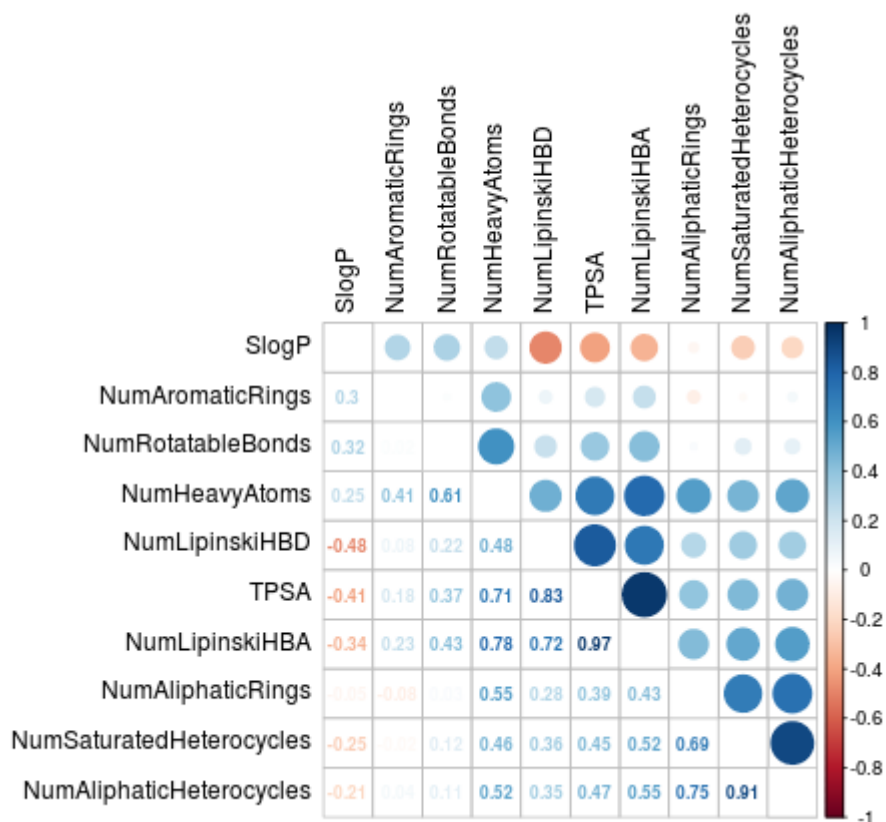

**Figure A** Correlation matrix of the descriptors used for the random forest

The size and color of the dots in the upper triangle represents the correlation of the respective. Larger dots indicate a higher contribution. The lower triangle represents the correlation as a numeric value.

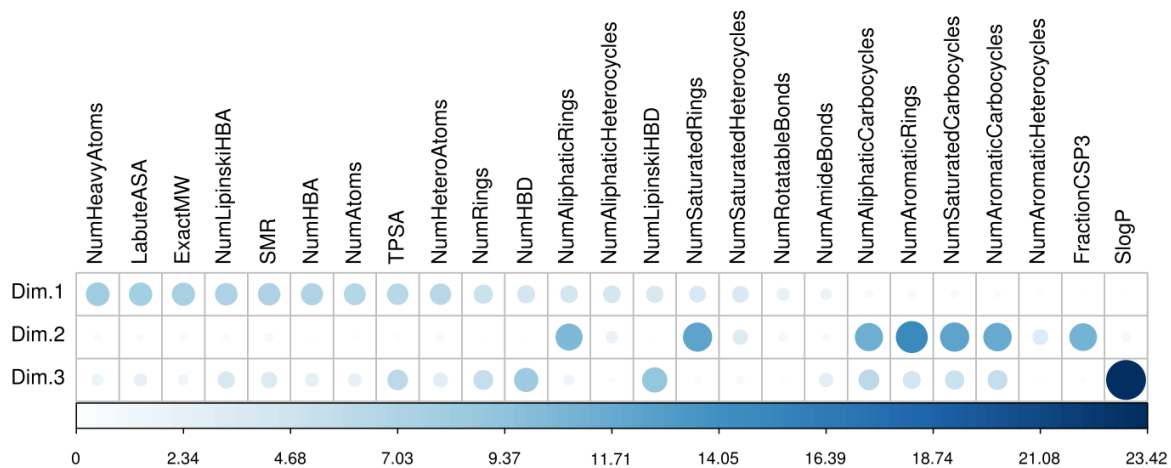

**Figure B** PCA contribution of variables.

The size and color of the dots represents the contribution of the respective descriptor to the principal component. Larger dots indicate a higher contribution.

## Supplement B

### Columns:

**DrugBankID:** Identifier of the DrugBank database  
**Name:** Generic name of the drug as defined in DrugBank  
**Evidence:** Whether literature was found to support the hypothesis that the compound is mitotoxic, "no literature found" indicates that, with the used search terms, we did not get any search results  
**Paper:** Literature supporting the evidence (Please note this is NOT an exhaustive list, merely examples supporting the assumption of a toxicity mechanism involving mitochondria)  
**Contains structural alert:** Whether the molecule was flagged by one of our 17 structural alerts  
**Positive predicted:** Whether the compound was predicted as positive by all our machine learning models

| DBID    | Name                | Evidence            | Paper                                                  | Contains Structural Alert | Positive Predicted |
|---------|---------------------|---------------------|--------------------------------------------------------|---------------------------|--------------------|
| DB09061 | Cannabidiol         | yes                 | Finsterer et al. doi: 10.1016/j.eplepsyres.2017.07.003 |                           | yes                |
| DB08896 | Regorafenib         | yes                 | Singh et al. doi: 10.1007/s12031-015-0545-2.           |                           | yes                |
| DB06263 | Amrubicin           | yes                 | Weng et al. doi: 10.1016/j.tox.2014.11.002.            | yes                       | yes                |
| DB06212 | Tolvaptan           | yes                 | Hanada et al. doi: 10.1111/j.1349-7006.2006.00318.x    | yes                       | yes                |
| DB04823 | Oxyphenisatin       | yes                 | Mosedale et al. doi: 10.1093/toxsci/ktx206.            | yes                       | yes                |
| DB01117 | Atovaquone          | yes                 | Woodhead et al. doi: 10.1093/toxsci/kfw193.            |                           | yes                |
| DB01076 | Atorvastatin        | yes                 | Morrison et al. doi: 10.1002/cam4.107.                 |                           | yes                |
| DB00445 | Epirubicin          | yes                 | Pinho et al. 10.1111/bph.12186                         | yes                       | yes                |
| DB00255 | Diethylstilbestrol  | yes                 | Oliveira et al. doi: 10.1007/s13318-015-0294-1.        |                           | yes                |
| DB01623 | Thiothixene         | yes                 | Broniarek et al. doi: 10.1016/j.abb.2017.12.003        |                           | yes                |
| DB08880 | Teriflunomide       | yes                 | Sadighara et al. doi: 10.1111/bcpt.12656               | yes                       | yes                |
| DB08901 | Ponatinib           | yes                 | Pal et al. doi: 10.1016/j.fct.2015.05.016.             | yes                       | yes                |
| DB12792 | Boscalid            | inconclusive        | Huang et al. doi: 10.1007/s10495-018-1450-2            |                           | yes                |
| DB06210 | Eltrombopag         | inconclusive        | Yoshida et al. doi: 10.1111/cas.12567                  | yes                       | yes                |
| DB05109 | Trabectedin         | inconclusive        | Guyen et al. doi: 10.1016/j.acthis.2006.09.007         |                           | yes                |
| DB00570 | Vinblastine         | inconclusive        | Berson et al. doi: 10.1016/S0016-5085(98)70590-6       |                           | yes                |
| DB00539 | Toremifene          | inconclusive        | Burkhardt et al. doi: 10.1002/ana.410330516            | yes                       | yes                |
| DB01094 | Hesperetin          | contradicting       | Xuan et al. doi: 10.1016/j.tox.2018.02.003.            | yes                       | yes                |
| DB00540 | Nortriptyline       | contradicting       | Paech et al. doi: 10.1016/j.tox.2018.01.005            | yes                       | yes                |
| DB14011 | Nabiximols          | no                  | Mingard et al. doi: 10.1002/jat.3551.                  |                           | yes                |
| DB13164 | Olmutinib           | no                  | Regueiro et al. doi: 10.1016/j.envres.2015.03.013.     |                           | yes                |
| DB12070 | Letermovir          | no                  | Kalota et al. doi: 10.1371/journal.pone.0126691.       |                           | yes                |
| DB11828 | Neratinib           | no                  | Gajate et al. doi: 10.1074/jbc.M204644200              |                           | yes                |
| DB11431 | Moxidectin          | no                  | Atmaca et al. doi: 10.1016/j.toxlet.2013.06.213.       |                           | yes                |
| DB09235 | Efonidipine         | no                  | Madhu et al. doi: 10.1002/jez.1917.                    |                           | yes                |
| DB09230 | Azelidipine         | no                  | Kallio et al. doi: 10.1007/s10495-005-2137-z           | yes                       | yes                |
| DB09079 | Nintedanib          | no                  | Wu et al. doi: 10.1007/s13277-015-4176-6               |                           | yes                |
| DB09048 | Netupitant          | no                  | Shagirtha et al. doi: 10.1177/0748233716665301         |                           | yes                |
| DB08976 | Floctafenine        | no                  | Yuan et al. doi: 10.1016/j.ejphar.2015.06.007          | yes                       | yes                |
| DB08906 | Fluticasone furoate | no                  | Zhang et al. doi: 10.1161/STROKEAHA.107.496810.        | yes                       | yes                |
| DB08899 | Enzalutamide        | no                  |                                                        |                           | yes                |
| DB08864 | Rilpivirine         | no                  |                                                        |                           | yes                |
| DB08828 | Vismodegib          | no                  |                                                        | yes                       | yes                |
| DB08827 | Lomitapide          | no                  |                                                        | yes                       | yes                |
| DB08820 | Ivacator            | no                  |                                                        | yes                       | yes                |
| DB06414 | Etravirine          | no                  |                                                        | yes                       | yes                |
| DB06249 | Arzoxifene          | no                  |                                                        | yes                       | yes                |
| DB04953 | Ezogabine           | no                  |                                                        | yes                       | yes                |
| DB01419 | Antrafenine         | no                  |                                                        | yes                       | yes                |
| DB01201 | Rilapentine         | no                  |                                                        | yes                       | yes                |
| DB01180 | Rescinnamine        | no                  |                                                        | yes                       | yes                |
| DB01089 | Deserpidine         | no                  |                                                        | yes                       | yes                |
| DB00393 | Nimodipine          | no                  |                                                        | yes                       | yes                |
| DB00157 | NADH                | no                  |                                                        | yes                       | yes                |
| DB00381 | Amlodipine          | no                  |                                                        | yes                       | yes                |
| DB00434 | Cyproheptadine      | no                  |                                                        | yes                       | yes                |
| DB00768 | Olopatadine         | no                  |                                                        | yes                       | yes                |
| DB00793 | Haloprogin          | no                  |                                                        | yes                       | yes                |
| DB00875 | Flupentixol         | no                  |                                                        | yes                       | yes                |
| DB00882 | Clomifene           | no                  |                                                        | yes                       | yes                |
| DB00924 | Cyclobenzaprine     | no                  |                                                        | yes                       | yes                |
| DB01023 | Felodipine          | no                  |                                                        | yes                       | yes                |
| DB01068 | Clonazepam          | no                  |                                                        | yes                       | yes                |
| DB01142 | Doxepin             | no                  |                                                        | yes                       | yes                |
| DB01239 | Chlorprothixene     | no                  |                                                        | yes                       | yes                |
| DB01411 | Pranlukast          | no                  |                                                        | yes                       | yes                |
| DB01544 | Flunitrazepam       | no                  |                                                        | yes                       | yes                |
| DB01624 | Zuclopenthixol      | no                  |                                                        | yes                       | yes                |
| DB04868 | Nilotinib           | no                  |                                                        | yes                       | yes                |
| DB04920 | Clevidipine         | no                  |                                                        | yes                       | yes                |
| DB04938 | Ospemifene          | no                  |                                                        | yes                       | yes                |
| DB04948 | Lofexidine          | no                  |                                                        | yes                       | yes                |
| DB06228 | Rivaroxaban         | no                  |                                                        | yes                       | yes                |
| DB06605 | Apixaban            | no                  |                                                        | yes                       | yes                |
| DB06708 | Lumefantrine        | no                  |                                                        | yes                       | yes                |
| DB06712 | Nilvadipine         | no                  |                                                        | yes                       | yes                |
| DB08810 | Cinitapride         | no                  |                                                        | yes                       | yes                |
| DB08968 | Fominoben           | no                  |                                                        | yes                       | yes                |
| DB09089 | Trimebutine         | no                  |                                                        | yes                       | yes                |
| DB09136 | Isosulfan blue      | no                  |                                                        | yes                       | yes                |
| DB09167 | Dosulepin           | no                  |                                                        | yes                       | yes                |
| DB09236 | Lacidipine          | no                  |                                                        | yes                       | yes                |
| DB11526 | Masitinib           | no                  |                                                        | yes                       | yes                |
| DB13967 | Patent Blue         | no                  |                                                        | yes                       | yes                |
| DB12364 | Betrixaban          | no literature found |                                                        | yes                       | yes                |
| DB09219 | Bisoxatin           | no literature found |                                                        |                           | yes                |
| DB09151 | Flutemetamol (18F)  | no literature found |                                                        |                           | yes                |
| DB00890 | Dienestrol          | no literature found |                                                        |                           | yes                |
| DB00877 | Sirolimus           | no literature found |                                                        |                           | yes                |
| DB00872 | Conivaptan          | no literature found |                                                        | yes                       | yes                |
| DB00693 | Fluorescein         | no literature found |                                                        |                           | yes                |
| DB00511 | Acetyldigitoxin     | no literature found |                                                        | yes                       | yes                |
| DB09237 | Levamlodipine       | no literature found |                                                        | yes                       | yes                |
| DB13114 | Amitriptylinoxide   | no literature found |                                                        | yes                       | yes                |
| DB13711 | Tritoqualine        | no literature found |                                                        | yes                       | yes                |

## Supplement C

|    | SMARTS                                            | Name                             | Occurrence | PPV   |
|----|---------------------------------------------------|----------------------------------|------------|-------|
| 1  | <chem>c1cc2C(=O)c3c(C(=O)c2c(O)c1)c(O)ccc3</chem> | Danthron, dihydroanthracene      | 14         | 1.000 |
| 2  | <chem>CNc1ccc(C(F))cc1</chem>                     | 4-(fluoromethyl)-N-methylaniline | 9          | 0.889 |
| 3  | <chem>C(=O)(c1cc(O)ccc1)c1ccc(cc1)</chem>         | P-hydroxybenzophenone            | 30         | 0.867 |
| 4  | <chem>O=C1c2ccccc2C(=O)c2ccccc21</chem>           | anthracene-9,10-diones           | 32         | 0.844 |
| 5  | <chem>c1(Cl)cccc(c1O)Cl</chem>                    | 2,6-dichlorophenol               | 12         | 0.833 |
| 6  | <chem>C1=CNC=CC1</chem>                           | dihydropyridine                  | 11         | 0.818 |
| 7  | <chem>[N+](=O)([O-])c1ccc(c(c1)C)O</chem>         | 2-methyl-4-nitrophenol           | 11         | 0.818 |
| 8  | <chem>c1(Cl)c(Cl)ccc(c1)O</chem>                  | 3,4-dichlorophenol               | 10         | 0.800 |
| 9  | <chem>c1(N)ccc(cc1)N=N</chem>                     | 4-diazenylaniline                | 10         | 0.800 |
| 10 | <chem>O=C1C=CCO1</chem>                           | 2,5-dihydrofuran-2-one           | 15         | 0.733 |
| 11 | <chem>c1ccc2cc3ccccc3cc2c1</chem>                 | anthracene                       | 15         | 0.733 |
| 12 | <chem>O=C(Nc1cccc1)c1cccc1</chem>                 | N-phenylbenzamide                | 33         | 0.697 |
| 13 | <chem>CCOC(=O)c1ccc(O)cc1</chem>                  | ethyl 4-hydroxybenzoate          | 23         | 0.696 |
| 14 | <chem>C1=CCOC1</chem>                             | 2,5-dihydrofuran                 | 16         | 0.688 |
| 15 | <chem>C(=O)(Nc1ccc(N)cc1)</chem>                  | N-(4-aminophenyl)formamide       | 12         | 0.667 |
| 16 | <chem>ClC(Cl)Cc1cccc1</chem>                      | (2,2-dichloroethyl)benzene       | 10         | 0.600 |
| 17 | <chem>c1c(cccc1)C(=C)c1cccc1</chem>               | (1-phenylethenyl)benzene         | 32         | 0.594 |
